# Supplementary material for: Economic Burden of Osteoporosis-Related Fractures in the US Medicare Population
Source: PubMed Central journal article supplement — Ann Pharmacother. 2020 Nov 4;55(7):821–9. doi: 10.1177/1060028020970518 (PMC8135238; doi:10.1177/1060028020970518), 2020-11-04
Supplement: AOP-20-0476_Supplemental_Table_1_1.pdf [file AOP-20-0476_Supplemental_Table_1_1.pdf]

**Supplemental Table 1. Pre-index Clinical Characteristics**

|                                                     | <b>Fracture Cohort</b> | <b>Matched Nonfracture Cohort</b> |
|-----------------------------------------------------|------------------------|-----------------------------------|
|                                                     | <b>(N = 885,676)</b>   | <b>(N = 885,676)</b>              |
| <b>Comorbidities that increase fall risk, n (%)</b> |                        |                                   |
| History of falls                                    | 119,554 (14)           | 112,126 (13)                      |
| Mobility impairments                                | 178,880 (20)           | 176,106 (20)                      |
| Muscle atrophy, muscle weakness, sarcopenia         | 31,728 (4)             | 30,869 (3)                        |
| Parkinson's disease                                 | 25,081 (3)             | 24,396 (3)                        |
| Prior history of stroke                             | 47,032 (5)             | 46,806 (5)                        |
| Vision impairments                                  | 35,374 (4)             | 35,322 (4)                        |
| <b>Medications that increase fall risk, n (%)</b>   |                        |                                   |
| Alpha blockers                                      | 96,824 (11)            | 95,417 (11)                       |
| Anticholinergic antihistamines                      | 39,290 (4)             | 38,816 (4)                        |
| Antipsychotics                                      | 12,821 (1)             | 12,556 (1)                        |
| Barbiturates                                        | 1035 (0.1)             | 978 (0.1)                         |
| Benzodiazepines                                     | 93,829 (11)            | 92,809 (10)                       |
| Beta blockers                                       | 383,982 (43)           | 382,298 (43)                      |
| Muscle relaxants                                    | 92,347 (10)            | 91,677 (10)                       |
| Nonbenzodiazepine, benzodiazepine receptor agonists | 80,556 (9)             | 79,796 (9)                        |

|                                                   |              |              |
|---------------------------------------------------|--------------|--------------|
| Opioids                                           | 443,676 (50) | 440,879 (50) |
| Proton pump inhibitors                            | 299,236 (34) | 297,161 (34) |
| Selective serotonin reuptake inhibitors           | 245,541 (28) | 242,177 (27) |
| Tricyclic antidepressants                         | 36,127 (4)   | 35,636 (4)   |
| Vasodilators                                      | 77,467 (9)   | 76,663 (9)   |
| <b>Other medications, n (%)</b>                   |              |              |
| Inhaled/nasal corticosteroids                     | 149,908 (17) | 148,500 (17) |
| Oral corticosteroids                              | 174,339 (20) | 172,964 (20) |
| <b>Comorbidities that lengthen healing, n (%)</b> |              |              |
| Diabetes                                          | 233,764 (26) | 233,404 (26) |
| Liver disease                                     | 24,133 (3)   | 23,960 (3)   |
| Renal disease                                     | 140,136 (16) | 138,537 (16) |
| <b>Other comorbidities, n (%)</b>                 |              |              |
| Alzheimer's disease                               | 67,300 (8)   | 65,722 (7)   |
| Anxiety                                           | 118,045 (13) | 116,521 (13) |
| Arthritis                                         | 335,661 (38) | 334,582 (38) |
| Bariatric surgery                                 | 210 (0)      | 221 (0.02)   |
| Cardiovascular diseases                           | 742,481 (84) | 739,614 (84) |
| Dementia                                          | 156,339 (18) | 152,712 (17) |
| Depression                                        | 160,727 (18) | 157,749 (18) |
| Hypertension                                      | 666,921 (75) | 664,071 (75) |
| Hypothyroidism                                    | 206,655 (23) | 205,251 (23) |
| Lung disease (COPD, asthma)                       | 191,078 (22) | 189,520 (21) |

|                                          |              |              |
|------------------------------------------|--------------|--------------|
| Musculoskeletal pain                     | 612,222 (69) | 609,456 (69) |
| Obesity                                  | 48,019 (5)   | 48,248 (5)   |
| Respiratory diseases <sup>a</sup>        | 296,409 (33) | 293,793 (33) |
| Rheumatoid arthritis                     | 30,032 (3)   | 30,005 (3)   |
| Sleep disorders                          | 96,291 (11)  | 95,645 (11)  |
| <b>Charlson comorbidity score, n (%)</b> |              |              |
| 0                                        | 502,609 (57) | 504,831 (57) |
| 1–2                                      | 230,218 (26) | 229,590 (26) |
| 3+                                       | 152,849 (17) | 151,525 (17) |

---

COPD, chronic obstructive pulmonary disease.

<sup>a</sup>Excluding COPD and asthma (eg, tuberculosis, pneumonia, bronchitis, sarcoidosis).
